# Supplementary material for: Transfer Learning Allows Accurate RBP Target Site Prediction with Limited Sample Sizes
Source: Biology (Basel). 2023 Sep 25;12(10):1276. doi: 10.3390/biology12101276 (PMC10604046; doi:10.3390/biology12101276)
Supplement: Supplementary file 1 [file biology-12-01276-s001.zip]

Archive with 7 entries (7 files):
- FigureS3_interpretationKmersRBP24.jpg
- FigureS4_interpretationKmersRBP31.jpg
- TableS1.pdf
- FigureS1_trainingApproachesRBP24Comparison.jpg
- FigureS2_trainingApproachesRBP31Comparison.jpg
- TableS3.pdf
- TableS2.pdf
