# Supplementary material for: Transfer Learning Allows Accurate RBP Target Site Prediction with Limited Sample Sizes
Source: Biology (Basel). 2023 Sep 25;12(10):1276. doi: 10.3390/biology12101276 (PMC10604046; doi:10.3390/biology12101276)
Supplement: Supplementary file 1 [file biology-12-01276-s001.zip › TableS1.pdf]

Table S1. Manually extracted average AUC values from published methods that used RBP-24 as benchmark set. The table shows difference in the average performance based on the amount of samples in the individual datasets.

| <b>Method</b>      | <b>Number of training samples</b> |                |            | <b>Source</b> |
|--------------------|-----------------------------------|----------------|------------|---------------|
|                    | <b>&lt;10K</b>                    | <b>&gt;10K</b> | <b>All</b> |               |
| <b>GraphProt</b>   | 0.865                             | 0.901          | 0.887      | [17]          |
| <b>deepnet-rbp</b> | 0.880                             | 0.916          | 0.903      | [33]          |
| <b>DeepBind</b>    | 0.882                             | 0.939          | 0.918      | [20]          |
| <b>iDeepV</b>      | 0.869                             | 0.939          | 0.913      | [60]          |
| <b>iDeepE</b>      | 0.905                             | 0.946          | 0.931      | [61]          |
| <b>DeepRKE</b>     | 0.902                             | 0.953          | 0.934      | [51]          |
| <b>PBVPP</b>       | 0.950                             | 0.955          | 0.953      | [64]          |
| <b>DeepMSA</b>     | 0.933                             | 0.958          | 0.949      | [62]          |
| <b>EDCNN</b>       | 0.924                             | 0.956          | 0.944      | [63]          |
| <b>ENNGene</b>     | 0.942                             | 0.949          | 0.947      | [31]          |
