# Supplementary material for: Transfer Learning Allows Accurate RBP Target Site Prediction with Limited Sample Sizes
Source: Biology (Basel). 2023 Sep 25;12(10):1276. doi: 10.3390/biology12101276 (PMC10604046; doi:10.3390/biology12101276)
Supplement: Supplementary file 1 [file biology-12-01276-s001.zip › TableS2.pdf]

Table S2. Comparison of the individual branches model performance measured in AUC scores on RBP-24 dataset, PTBv1 was excluded as described in the paper.

| Protein               | RBP-24       |              |           |
|-----------------------|--------------|--------------|-----------|
|                       | Seq          | Cons         | SecStruct |
| ALKBH5_Baltz2012      | 0.800        | <b>0.878</b> | 0.578     |
| C17ORF85_Baltz2012    | 0.869        | <b>0.895</b> | 0.617     |
| C22ORF28_Baltz2012    | 0.853        | <b>0.895</b> | 0.581     |
| CAPRIN1_Baltz2012     | 0.823        | <b>0.863</b> | 0.568     |
| CLIPSEQ_AGO2          | 0.879        | <b>0.888</b> | 0.570     |
| CLIPSEQ_ELAVL1        | <b>0.976</b> | 0.837        | 0.644     |
| CLIPSEQ_SFRS1         | <b>0.931</b> | 0.849        | 0.628     |
| ICLIP_HNRNPC          | <b>0.975</b> | 0.540        | 0.629     |
| ICLIP_TDP43           | <b>0.919</b> | 0.596        | 0.605     |
| ICLIP_TIA1            | <b>0.941</b> | 0.820        | 0.602     |
| ICLIP_TIAL1           | <b>0.938</b> | 0.784        | 0.585     |
| PARCLIP_AGO1234       | <b>0.878</b> | 0.867        | 0.563     |
| PARCLIP_ELAVL1        | <b>0.957</b> | 0.738        | 0.679     |
| PARCLIP_ELAVL1A       | <b>0.976</b> | 0.843        | 0.670     |
| PARCLIP_EWSR1         | <b>0.954</b> | 0.771        | 0.625     |
| PARCLIP_FUS           | <b>0.979</b> | 0.682        | 0.638     |
| PARCLIP_HUR           | <b>0.989</b> | 0.711        | 0.701     |
| PARCLIP_IGF2BP123     | <b>0.898</b> | 0.828        | 0.609     |
| PARCLIP_MOV10_Sievers | 0.860        | <b>0.871</b> | 0.594     |
| PARCLIP_PUM2          | <b>0.954</b> | 0.842        | 0.635     |
| PARCLIP_QKI           | <b>0.974</b> | 0.642        | 0.721     |
| PARCLIP_TAF15         | <b>0.986</b> | 0.741        | 0.667     |
| ZC3H7B_Baltz2012      | 0.786        | <b>0.796</b> | 0.538     |
