# Supplementary material for: Transfer Learning Allows Accurate RBP Target Site Prediction with Limited Sample Sizes
Source: Biology (Basel). 2023 Sep 25;12(10):1276. doi: 10.3390/biology12101276 (PMC10604046; doi:10.3390/biology12101276)
Supplement: Supplementary file 1 [file biology-12-01276-s001.zip › TableS3.pdf]

Table S3. Comparison of the individual branches model performance measured in AUC scores on RBP-31 dataset.

| RBP-31       |              |              |           |
|--------------|--------------|--------------|-----------|
| Protein      | Seq          | Cons         | SecStruct |
| Ago/EIF      | 0.717        | <b>0.857</b> | 0.574     |
| Ago2-MNase   | 0.594        | <b>0.695</b> | 0.515     |
| Ago2-1       | 0.836        | <b>0.913</b> | 0.534     |
| Ago2-2       | 0.852        | <b>0.900</b> | 0.535     |
| Ago2         | 0.621        | <b>0.638</b> | 0.476     |
| eIF4AIII-1   | 0.932        | <b>0.962</b> | 0.606     |
| eIF4AIII-2   | <b>0.938</b> | 0.935        | 0.553     |
| ELAVL1-1     | <b>0.920</b> | 0.777        | 0.637     |
| ELAVL1-MNase | 0.584        | <b>0.714</b> | 0.535     |
| ELAVL1A      | 0.854        | <b>0.861</b> | 0.678     |
| ELAVL1-2     | <b>0.933</b> | 0.887        | 0.698     |
| EWSR1        | <b>0.899</b> | 0.792        | 0.689     |
| FUS          | <b>0.946</b> | 0.709        | 0.660     |
| Mut FUS      | <b>0.939</b> | 0.829        | 0.656     |
| IGFBP1-3     | 0.681        | <b>0.829</b> | 0.565     |
| hnRNPC-1     | <b>0.953</b> | 0.672        | 0.622     |
| hnRNPC-2     | <b>0.978</b> | 0.552        | 0.599     |
| hnRNPL-1     | <b>0.699</b> | 0.661        | 0.514     |
| hnRNPL-2     | <b>0.652</b> | 0.564        | 0.530     |
| hnRNPL-like  | 0.643        | <b>0.676</b> | 0.519     |
| MOV10        | 0.814        | <b>0.827</b> | 0.473     |
| Nsun2        | 0.751        | <b>0.767</b> | 0.634     |
| PUM2         | <b>0.959</b> | 0.878        | 0.599     |
| QKI          | <b>0.958</b> | 0.703        | 0.721     |
| SRSF1        | <b>0.883</b> | 0.873        | 0.625     |
| TAF15        | <b>0.767</b> | 0.554        | 0.591     |
| TDP-43       | <b>0.909</b> | 0.645        | 0.535     |
| TIA1         | 0.867        | <b>0.875</b> | 0.608     |
| TIAL1        | <b>0.890</b> | 0.774        | 0.602     |
| U2AF2        | <b>0.969</b> | 0.830        | 0.585     |
| U2AF2(KD)    | <b>0.923</b> | 0.805        | 0.550     |
